# Supplementary material
Source: PubMed Central journal article supplement (PMC3757333)
Supplement: supp_126.17.3948_JCS128033.pdf [file supp_126.17.3948_JCS128033.pdf]

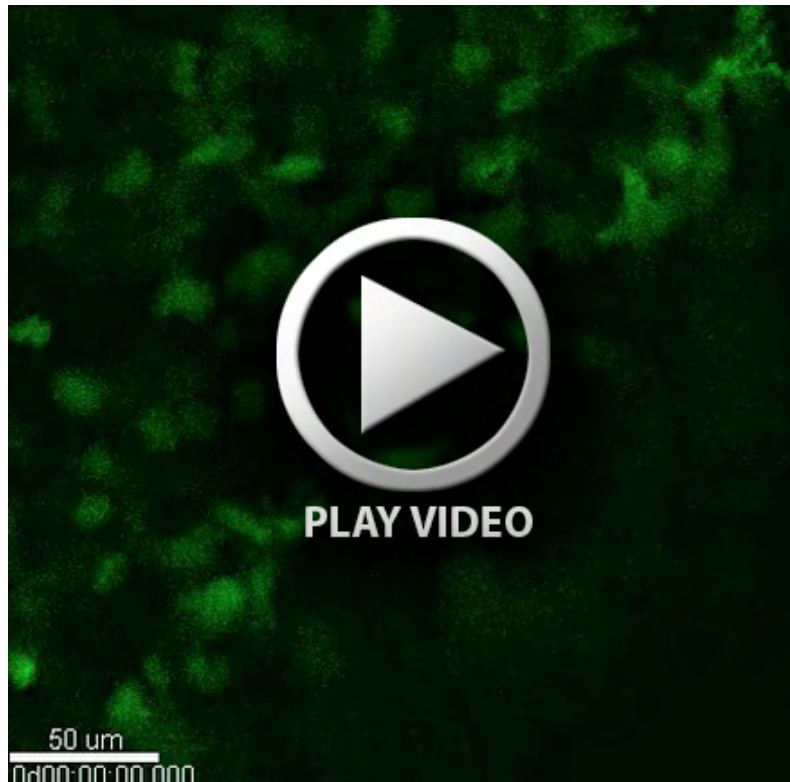

**Movie 1. Myeloid cell dynamics in the central cornea stroma of a WT;*c-fms-EGFP* mouse 1 day after injury.** (Related to Figure 4A.) The central cornea of a WT;*c-fms-EGFP* mouse with myeloid cells expressing GFP was imaged 1 day after injury with 0.1 N NaOH. Images were obtained using *in vivo*, time-lapse confocal microscopy (Nikon C1si spectral confocal laser-scanning microscope). Individual images were taken every 3.22 seconds for 30 minutes.

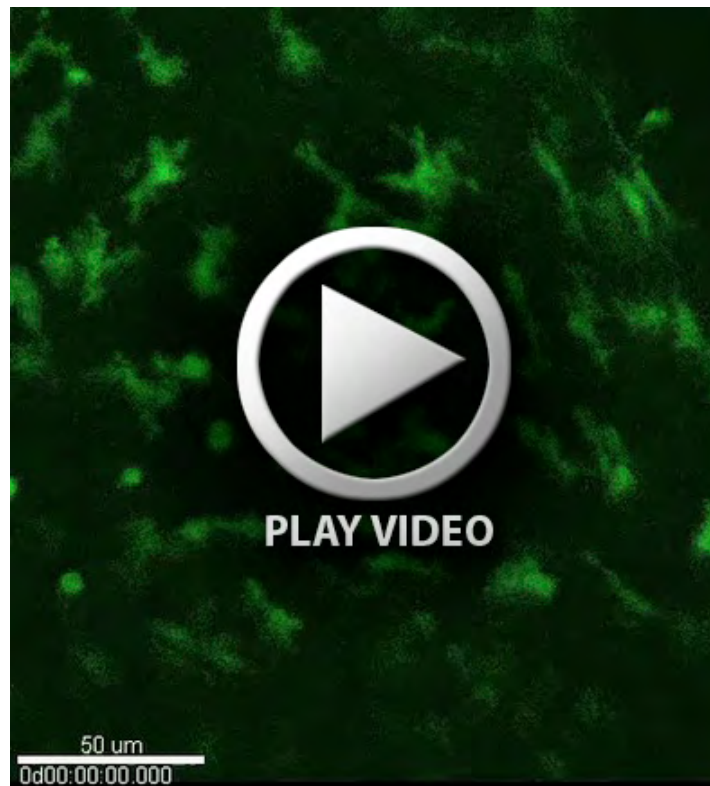

**Movie 2. Myeloid cell dynamics in the central cornea stroma of a *Mmp12*<sup>-/-</sup>;*c-fms-EGFP* mouse 1 day after injury.** (Related to Figure 4A.) The central cornea of a *Mmp12*<sup>-/-</sup>;*c-fms-EGFP* mouse with myeloid cells expressing GFP was imaged 1 day after injury with 0.1 N NaOH. Images were obtained using *in vivo*, time-lapse confocal microscopy (Nikon C1si spectral confocal laser-scanning microscope). Individual images were taken every 3.22 seconds for 30 minutes.

**Table S1. Real-time PCR Primer sequences**

| <b>Gene</b>  | <b>Forward (5' – 3')</b> | <b>Reverse (5' – 3')</b> |
|--------------|--------------------------|--------------------------|
| <i>MMP12</i> | TGGGCAACTGGACAACTCAACTCT | ACCGCTTCATCCATCTTGACCTCT |
| <i>CCL2</i>  | TTAAAAACCTGGATCGGAACCAA  | GCATTAGCTTCAGATTTACGGGT  |
| <i>CCL7</i>  | GCTGCTTTCAGCATCCAAGTG    | CCAGGGACACCGACTACTG      |
| <i>CCL8</i>  | TCTACGCAGTGCTTCTTTGCC    | AAGGGGGATCTTCAGCTTTAGTA  |
| <i>CCL20</i> | GCCTCTCGTACATACAGACGC    | CCAGTTCTGCTTTGGATCAGC    |
| <i>VegfA</i> | CCAGACCTCTCACCGGAAAG     | CTGTCAACGGTGACGATGATG    |
| <i>VegfB</i> | GAGATGTCCCTGGAAGAACACA   | GAGTGGGATGGGTGATGTCAG    |
| <i>Hprt</i>  | GCCTAAGATGAGCGCAAGTTG    | TACTAGGCAGATGGCCACAGG    |
| <i>Sma</i>   | GCAAACAGGAATACGACGAAGC   | GCTTTGGGCAGGAATGATTTG    |
| <i>Col1</i>  | TGGATTCCCGTTTCGAGTACG    | ATTAGGCGCAGGAAGGTCAG     |
| <i>Col3</i>  | CTGTAACATGGAAACTGGGGAAA  | CCATAGCTGAACTGAAAACCACC  |
| <i>Gapdh</i> | AGGTCGGTGTGAACGGATTTG    | TGTAGACCATGTAGTTGAGGTCA  |
